# Supplementary material for: Genomic Variation among Strains of Crithidia bombi and C. expoeki
Source: PubMed Central journal article supplement (PMC6739494; doi:10.1128/msphere.00482-19), 2019-09-11
Supplement: mSphere.00482-19-st002.pdf [file mSphere.00482-19-st002.pdf]

| Strain description |         | Sequencing stats    |                |                     |                  | SNP calling stats |               |                |                  |             |               |      | SNP in microcircle |                  |                 |               |                | Overall genome variation |             |               |                |                 |
|--------------------|---------|---------------------|----------------|---------------------|------------------|-------------------|---------------|----------------|------------------|-------------|---------------|------|--------------------|------------------|-----------------|---------------|----------------|--------------------------|-------------|---------------|----------------|-----------------|
| Strain code        | Species | Sequencing platform | Total reads, M | Proper pairs mapped | Average coverage | Median coverage   | SNP reference | SNP homozygote | SNP heterozygote | Transitions | Transversions | TcTv | SNPs, %            | Average coverage | Median coverage | SNP reference | SNP homozygote | SNP heterozygote         | Transitions | Transversions | SNP density, m | 1 / SNP density |
| 08_086             | bombi   | Hiseq 2500          | 32.43          | 93.39%              | 127.1            | 110               | 148461        | 6464           | 10943            | 12283       | 4892          | 2.41 | 0.101              | 194.7            | 213             | 86            | 2              | 0                        | 2           | 0             | 1923           |                 |
| 08_075             | bombi   | Hiseq 2500          | 33.55          | 94.96%              | 127.7            | 111               | 147717        | 6464           | 10943            | 12283       | 5124          | 2.40 | 0.105              | 718.5            | 792             | 84            | 3              | 1                        | 3           | 1             | 1841           |                 |
| 08_091             | bombi   | Hiseq 4000          | 23.42          | 87.21%              | 110.2            | 107               | 148528        | 6271           | 10335            | 11666       | 4930          | 2.37 | 0.101              | 377.7            | 387             | 82            | 3              | 3                        | 5           | 1             | 1930           |                 |
| 08_091             | bombi   | Hiseq 4000          | 20.41          | 88.31%              | 97               | 94                | 148557        | 6244           | 10373            | 11676       | 4941          | 2.36 | 0.101              | 325.7            | 333             | 83            | 3              | 2                        | 5           | 0             | 1928           |                 |
| 08_134             | bombi   | Hiseq 2500          | 24.6           | 94.52%              | 94.3             | 82                | 148281        | 6457           | 10386            | 11893       | 4950          | 2.40 | 0.102              | 471.0            | 516             | 86            | 2              | 0                        | 2           | 0             | 1902           |                 |
| 08_161             | bombi   | Hiseq 4000          | 14.13          | 88.12%              | 66.9             | 60                | 147737        | 6293           | 11094            | 12343       | 5044          | 2.45 | 0.105              | 500.0            | 521             | 83            | 2              | 2                        | 5           | 0             | 1843           |                 |
| 08_281             | bombi   | Hiseq 2500          | 23.7           | 94.38%              | 90               | 82                | 146715        | 6224           | 12185            | 12095       | 5314          | 2.46 | 0.111              | 540.7            | 607             | 86            | 1              | 1                        | 1           | 1             | 1740           |                 |
| 10_027             | bombi   | Hiseq 2500          | 26.56          | 93.80%              | 101.6            | 92                | 147898        | 6215           | 11011            | 12220       | 5006          | 2.44 | 0.104              | 118.5            | 125             | 85            | 3              | 0                        | 3           | 0             | 1800           |                 |
| 10_132             | bombi   | Hiseq 4000          | 23.39          | 87.33%              | 110.6            | 109               | 147504        | 6338           | 11392            | 12469       | 5151          | 2.42 | 0.107              | 316.0            | 322             | 84            | 1              | 3                        | 3           | 1             | 1818           |                 |
| 10_175             | bombi   | Hiseq 2500          | 31.93          | 94.47%              | 119              | 109               | 147507        | 6376           | 11641            | 12467       | 5150          | 2.42 | 0.107              | 93.5             | 97              | 85            | 3              | 0                        | 3           | 0             | 1819           |                 |
| 10_290             | bombi   | Hiseq 2500          | 30.66          | 93.17%              | 117.2            | 103               | 147823        | 6291           | 11010            | 12221       | 5080          | 2.41 | 0.105              | 167.9            | 192             | 84            | 3              | 1                        | 3           | 1             | 1852           |                 |
| 10_486             | bombi   | Hiseq 2500          | 33.57          | 93.74%              | 123.2            | 118               | 147320        | 6265           | 11409            | 12560       | 5134          | 2.41 | 0.108              | 184.8            | 209             | 86            | 2              | 0                        | 1           | 1             | 1803           |                 |
| 12_246             | bombi   | Hiseq 2500          | 25.09          | 95.24%              | 96.2             | 85                | 147432        | 6157           | 11335            | 12541       | 5151          | 2.43 | 0.107              | 474.3            | 516             | 85            | 2              | 1                        | 2           | 1             | 1811           |                 |
| 12_248             | bombi   | Hiseq 2500          | 42.04          | 94.96%              | 162.4            | 148               | 147680        | 6341           | 11103            | 12305       | 5139          | 2.39 | 0.106              | 114.3            | 127             | 85            | 3              | 0                        | 3           | 0             | 1837           |                 |
| 12_444             | bombi   | Hiseq 2500          | 27.49          | 95.01%              | 106.1            | 94                | 148008        | 6101           | 10965            | 12091       | 4975          | 2.43 | 0.103              | 536.0            | 620             | 87            | 1              | 0                        | 1           | 0             | 1877           |                 |
| 12_448             | bombi   | Hiseq 2500          | 25.86          | 92.59%              | 98.2             | 90                | 147426        | 6328           | 11370            | 12326       | 5172          | 2.42 | 0.107              | 85.9             | 89              | 87            | 1              | 0                        | 1           | 0             | 1810           |                 |
| 12_450             | bombi   | Hiseq 2500          | 27.52          | 95.20%              | 105.6            | 99                | 147239        | 6083           | 11002            | 12479       | 5208          | 2.44 | 0.108              | 115.8            | 117             | 89            | 3              | 0                        | 3           | 0             | 1791           |                 |
| 14_055             | bombi   | Hiseq 2500          | 29.92          | 95.64%              | 116.1            | 103               | 147921        | 6315           | 11338            | 12389       | 5064          | 2.45 | 0.106              | 96.7             | 105             | 87            | 1              | 0                        | 1           | 0             | 1836           |                 |
| 14_149             | bombi   | Hiseq 2500          | 22.81          | 93.59%              | 87.5             | 80                | 146487        | 6383           | 12234            | 13201       | 5436          | 2.43 | 0.113              | 69.4             | 70              | 86            | 2              | 0                        | 2           | 0             | 1719           |                 |
| 14_255             | bombi   | Hiseq 2500          | 22.84          | 92.02%              | 86.2             | 80                | 147029        | 6235           | 11760            | 12811       | 5284          | 2.42 | 0.110              | 67.2             | 68              | 87            | 1              | 0                        | 1           | 0             | 1771           |                 |
| 14_338             | bombi   | Hiseq 2500          | 21.41          | 92.47%              | 81.1             | 71                | 147666        | 6510           | 10948            | 12394       | 5064          | 2.45 | 0.106              | 128.9            | 125             | 85            | 2              | 1                        | 2           | 1             | 1835           |                 |
| A08_040            | bombi   | Hiseq 4000          | 20.74          | 86.27%              | 98.1             | 89                | 140821        | 10880          | 13413            | 17386       | 7007          | 2.47 | 0.147              | 187.1            | 191             | 79            | 8              | 1                        | 8           | 1             | 1319           |                 |
| A08_047            | bombi   | Hiseq 4000          | 21.1           | 88.89%              | 100.1            | 83                | 18827         | 9060           | 8347             | 55992       | 20505         | 2.78 | 0.461              | 302.3            | 304             | 79            | 9              | 0                        | 8           | 1             | 419            |                 |
| A08_053            | bombi   | Hiseq 4000          | 23.89          | 88.67%              | 113.5            | 103               | 81103         | 64085          | 19936            | 61554       | 22467         | 2.74 | 0.509              | 381.6            | 404             | 12            | 76             | 0                        | 69          | 7             | 381            |                 |
| A08_053            | bombi   | Hiseq 4000          | 20.23          | 89.59%              | 96.2             | 87                | 81183         | 63426          | 20515            | 61495       | 22446         | 2.74 | 0.508              | 357.3            | 371             | 12            | 76             | 0                        | 69          | 7             | 382            |                 |
| A08_058            | bombi   | Hiseq 4000          | 25.79          | 87.74%              | 122.2            | 118               | 88825         | 9780           | 66519            | 55853       | 20446         | 2.73 | 0.462              | 310.1            | 298             | 78            | 9              | 1                        | 8           | 2             | 420            |                 |
| A08_052            | bombi   | Hiseq 4000          | 20.87          | 86.38%              | 98.6             | 89                | 140166        | 10721          | 14237            | 17738       | 7220          | 2.46 | 0.151              | 331.7            | 338             | 79            | 8              | 1                        | 7           | 2             | 1284           |                 |
| E2_012             | bombi   | Hiseq 4000          | 22.24          | 88.52%              | 107.6            | 99                | 148448        | 7220           | 9416             | 11712       | 4924          | 2.38 | 0.101              | 105.5            | 143             | 83            | 4              | 1                        | 3           | 2             | 1926           |                 |
| E3_1               | bombi   | Hiseq 4000          | 20.45          | 88.75%              | 96.7             | 88                | 147171        | 6221           | 11732            | 12735       | 5218          | 2.44 | 0.109              | 141.5            | 136             | 82            | 3              | 3                        | 5           | 1             | 1785           |                 |
| A08_209            | expoli  | Hiseq 4000          | 15.53          | 90.88%              | 68.8             | 77                | 19910         | 20526          | 7289             | 19988       | 7827          | 2.55 | 0.583              | 643.9            | 789             | 19            | 36             | 2                        | 30          | 8             | 1225           |                 |
| A08_287            | expoli  | Hiseq 4000          | 17.83          | 88.47%              | 78.8             | 80                | 19059         | 20523          | 7243             | 20238       | 7838          | 2.58 | 0.588              | 1004.3           | 1248            | 18            | 38             | 1                        | 31          | 8             | 1214           |                 |
| A08_539            | expoli  | Hiseq 4000          | 20.22          | 87.50%              | 88.6             | 89                | 19993         | 20102          | 7630             | 19902       | 7830          | 2.54 | 0.581              | 560.5            | 692             | 20            | 36             | 1                        | 29          | 8             | 1229           |                 |
| A08_559            | expoli  | Hiseq 4000          | 18.84          | 87.56%              | 79.3             | 89                | 19880         | 20210          | 7655             | 19981       | 7854          | 2.54 | 0.583              | 812.0            | 994             | 20            | 36             | 1                        | 29          | 8             | 1224           |                 |
| B08_064            | expoli  | Hiseq 4000          | 16.97          | 88.28%              | 74.3             | 83                | 41626         | 1930           | 4169             | 4367        | 1732          | 2.82 | 0.138              | 1038.0           | 1120            | 52            | 4              | 1                        | 5           | 0             | 5587           |                 |
| B08_068            | expoli  | Hiseq 4000          | 11.7           | 81.06%              | 51.3             | 51                | 41804         | 1969           | 3952             | 4177        | 1744          | 2.40 | 0.124              | 79.1             | 87              | 52            | 2              | 3                        | 5           | 0             | 5755           |                 |
| B08_074            | expoli  | Hiseq 4000          | 18.31          | 86.48%              | 79.9             | 87                | 41561         | 1861           | 4303             | 4395        | 1769          | 2.48 | 0.120              | 1284.6           | 1322            | 56            | 1              | 0                        | 1           | 0             | 5529           |                 |
| B08_083            | expoli  | Hiseq 4000          | 17.07          | 92.13%              | 75.2             | 84                | 41798         | 2001           | 3926             | 4185        | 1742          | 2.40 | 0.124              | 1058.3           | 1137            | 51            | 4              | 2                        | 6           | 0             | 5750           |                 |
| B08_162            | expoli  | Hiseq 4000          | 18.53          | 88.79%              | 81.1             | 91                | 41796         | 1982           | 3998             | 4223        | 1707          | 2.47 | 0.124              | 1991.1           | 1446            | 56            | 1              | 0                        | 1           | 0             | 5747           |                 |
| B08_163            | expoli  | Hiseq 4000          | 16.54          | 83.74%              | 72.2             | 80                | 41596         | 1884           | 4145             | 4372        | 1757          | 2.49 | 0.120              | 191.2            | 140             | 49            | 8              | 0                        | 6           | 0             | 5560           |                 |
| B08_168            | expoli  | Hiseq 4000          | 22.38          | 86.88%              | 97.7             | 110               | 41530         | 2041           | 4154             | 4414        | 1783          | 2.48 | 0.130              | 878.2            | 944             | 53            | 3              | 1                        | 3           | 1             | 5001           |                 |
| B08_172            | expoli  | Hiseq 4000          | 15.56          | 85.15%              | 67.9             | 75                | 41804         | 1969           | 3952             | 4221        | 1700          | 2.48 | 0.124              | 806.5            | 867             | 56            | 1              | 0                        | 1           | 0             | 5755           |                 |
| B08_175a           | expoli  | Hiseq 4000          | 15.63          | 88.14%              | 68.2             | 76                | 43466         | 347            | 3912             | 3023        | 1236          | 2.45 | 0.089              | 763.1            | 805             | 56            | 1              | 0                        | 1           | 0             | 8001           |                 |
| B08_193            | expoli  | Hiseq 4000          | 15.48          | 86.55%              | 67.8             | 74                | 41448         | 1877           | 4380             | 4855        | 1802          | 2.47 | 0.131              | 325.5            | 283             | 51            | 6              | 0                        | 6           | 0             | 5446           |                 |
