# Supplementary material for: Genomic Variation among Strains of Crithidia bombi and C. expoeki
Source: PubMed Central journal article supplement (PMC6739494; doi:10.1128/msphere.00482-19), 2019-09-11
Supplement: mSphere.00482-19-st006.pdf [file mSphere.00482-19-st006.pdf]

| GO                                                                | Definition                                  | Annotated | Significant | Expected | exactFisher, p-value | Species color code |
|-------------------------------------------------------------------|---------------------------------------------|-----------|-------------|----------|----------------------|--------------------|
| <b>A. Crithidia bombi, genes with positively selected sites</b>   |                                             |           |             |          |                      |                    |
| <b>Biological process</b>                                         |                                             |           |             |          |                      |                    |
| 1 GO:0007018                                                      | microtubule-based movement                  | 92        | 21          | 8.73     | 8.6e-05              |                    |
| 2 GO:0006259                                                      | DNA metabolic process                       | 176       | 29          | 16.70    | 0.0017               |                    |
| 3 GO:0006928                                                      | movement of cell or subcellular componen... | 120       | 21          | 11.38    | 0.0036               |                    |
| 4 GO:0007017                                                      | microtubule-based process                   | 138       | 23          | 13.09    | 0.0044               |                    |
| 5 GO:0015748                                                      | organophosphate ester transport             | 5         | 3           | 0.47     | 0.0073               |                    |
| 10 GO:0009190                                                     | cyclic nucleotide biosynthetic process      | 10        | 4           | 0.95     | 0.0105               |                    |
| 11 GO:0043412                                                     | macromolecule modification                  | 463       | 57          | 43.93    | 0.0163               |                    |
| 12 GO:0009187                                                     | cyclic nucleotide metabolic process         | 12        | 4           | 1.14     | 0.0212               |                    |
| 14 GO:0006464                                                     | cellular protein modification process       | 412       | 50          | 39.09    | 0.0314               |                    |
| 15 GO:0036211                                                     | protein modification process                | 412       | 50          | 39.09    | 0.0314               |                    |
| 16 GO:0006869                                                     | lipid transport                             | 8         | 3           | 0.76     | 0.0330               |                    |
| 17 GO:0030031                                                     | cell projection assembly                    | 14        | 4           | 1.33     | 0.0369               |                    |
| <b>Molecular function</b>                                         |                                             |           |             |          |                      |                    |
| 1 GO:0005488                                                      | binding                                     | 2542      | 321         | 286.25   | 1.8e-05              |                    |
| 2 GO:0003774                                                      | motor activity                              | 83        | 22          | 9.35     | 7.7e-05              |                    |
| 3 GO:0003777                                                      | microtubule motor activity                  | 79        | 21          | 8.90     | 0.00011              |                    |
| 4 GO:0016462                                                      | pyrophosphatase activity                    | 394       | 66          | 44.37    | 0.00033              |                    |
| 5 GO:0017111                                                      | nucleoside-triphosphatase activity          | 387       | 65          | 43.58    | 0.00034              |                    |
| 6 GO:0016818                                                      | hydrolase activity, acting on acid anhyd... | 395       | 66          | 44.48    | 0.00035              |                    |
| 7 GO:0016817                                                      | hydrolase activity, acting on acid anhyd... | 398       | 66          | 44.82    | 0.00044              |                    |
| 8 GO:0005524                                                      | ATP binding                                 | 633       | 93          | 71.28    | 0.00208              |                    |
| 9 GO:0032559                                                      | adenyl ribonucleotide binding               | 637       | 93          | 71.73    | 0.00256              |                    |
| 10 GO:0016887                                                     | ATPase activity                             | 189       | 34          | 21.28    | 0.00317              |                    |
| 11 GO:0005515                                                     | protein binding                             | 1053      | 142         | 118.58   | 0.00427              |                    |
| 12 GO:0030554                                                     | adenyl nucleotide binding                   | 649       | 93          | 73.08    | 0.00459              |                    |
| 13 GO:0008144                                                     | drug binding                                | 676       | 95          | 76.12    | 0.00746              |                    |
| 14 GO:0004012                                                     | phospholipid-translocating ATPase activi... | 5         | 3           | 0.56     | 0.01191              |                    |
| 15 GO:0005548                                                     | phospholipid transporter activity           | 5         | 3           | 0.56     | 0.01191              |                    |
| 16 GO:0004608                                                     | phosphatidylethanolamine N-methyltransfe... | 2         | 2           | 0.23     | 0.01265              |                    |
| 17 GO:0097367                                                     | carbohydrate derivative binding             | 748       | 101         | 84.23    | 0.01847              |                    |
| 18 GO:0004252                                                     | serine-type endopeptidase activity          | 10        | 4           | 1.13     | 0.01912              |                    |
| 19 GO:0016849                                                     | phosphorus-oxygen lyase activity            | 10        | 4           | 1.13     | 0.01912              |                    |
| 20 GO:0032553                                                     | ribonucleotide binding                      | 743       | 100         | 83.67    | 0.02086              |                    |
| 21 GO:0005319                                                     | lipid transporter activity                  | 6         | 3           | 0.68     | 0.02185              |                    |
| 22 GO:0035639                                                     | purine ribonucleoside triphosphate bindi... | 727       | 97          | 81.87    | 0.02873              |                    |
| 23 GO:0032555                                                     | purine ribonucleotide binding               | 731       | 97          | 82.32    | 0.03295              |                    |
| 24 GO:0008017                                                     | microtubule binding                         | 68        | 13          | 7.66     | 0.03716              |                    |
| 25 GO:0140097                                                     | catalytic activity, acting on DNA           | 76        | 14          | 8.56     | 0.04151              |                    |
| <b>B. Crithidia expoeki, genes with positively selected sites</b> |                                             |           |             |          |                      |                    |
| <b>Biological process</b>                                         |                                             |           |             |          |                      |                    |
| 1 GO:0019219                                                      | regulation of nucleobase-containing comp... | 96        | 10          | 3.94     | 0.0054               |                    |
| 2 GO:0006351                                                      | transcription, DNA-templated                | 103       | 10          | 4.23     | 0.0089               |                    |
| 3 GO:0097659                                                      | nucleic acid-templated transcription        | 103       | 10          | 4.23     | 0.0089               |                    |
| 4 GO:0032774                                                      | RNA biosynthetic process                    | 104       | 10          | 4.27     | 0.0095               |                    |
| 5 GO:0051252                                                      | regulation of RNA metabolic process         | 90        | 9           | 3.69     | 0.0107               |                    |
| 6 GO:0055085                                                      | transmembrane transport                     | 201       | 15          | 8.25     | 0.0165               |                    |
| 7 GO:0009187                                                      | cyclic nucleotide metabolic process         | 15        | 3           | 0.62     | 0.0214               |                    |
| 8 GO:0009190                                                      | cyclic nucleotide biosynthetic process      | 15        | 3           | 0.62     | 0.0214               |                    |
| 9 GO:0006355                                                      | regulation of transcription, DNA-templat... | 54        | 6           | 2.22     | 0.0219               |                    |
| 10 GO:1903506                                                     | regulation of nucleic acid-templated tra... | 54        | 6           | 2.22     | 0.0219               |                    |
| 11 GO:2001141                                                     | regulation of RNA biosynthetic process      | 54        | 6           | 2.22     | 0.0219               |                    |
| 12 GO:0033043                                                     | regulation of organelle organization        | 28        | 4           | 1.15     | 0.0259               |                    |
| 13 GO:0006188                                                     | IMP biosynthetic process                    | 7         | 2           | 0.29     | 0.0307               |                    |
| 14 GO:0010638                                                     | positive regulation of organelle organiz... | 7         | 2           | 0.29     | 0.0307               |                    |
| 15 GO:0016553                                                     | base conversion or substitution editing     | 7         | 2           | 0.29     | 0.0307               |                    |
| 16 GO:0016554                                                     | cytidine to uridine editing                 | 7         | 2           | 0.29     | 0.0307               |                    |
| <b>Molecular function</b>                                         |                                             |           |             |          |                      |                    |
| 1 GO:0001882                                                      | nucleoside binding                          | 131       | 12          | 6.01     | 0.016                |                    |
| 2 GO:0032549                                                      | ribonucleoside binding                      | 131       | 12          | 6.01     | 0.016                |                    |
| 3 GO:0022804                                                      | active transmembrane transporter activit... | 101       | 10          | 4.64     | 0.017                |                    |
| 4 GO:0016706                                                      | oxidoreductase activity, acting on paire... | 14        | 3           | 0.64     | 0.024                |                    |
| 5 GO:0001883                                                      | purine nucleoside binding                   | 126       | 11          | 5.79     | 0.029                |                    |
| 6 GO:0005525                                                      | GTP binding                                 | 126       | 11          | 5.79     | 0.029                |                    |
| 7 GO:0019001                                                      | guanyl nucleotide binding                   | 126       | 11          | 5.79     | 0.029                |                    |

|    |            |                                             |      |     |        |       |
|----|------------|---------------------------------------------|------|-----|--------|-------|
| 8  | GO:0032550 | purine ribonucleoside binding               | 126  | 11  | 5.79   | 0.029 |
| 9  | GO:0032561 | guanyl ribonucleotide binding               | 126  | 11  | 5.79   | 0.029 |
| 10 | GO:0042626 | ATPase activity, coupled to transmembran... | 81   | 8   | 3.72   | 0.031 |
| 11 | GO:0043492 | ATPase activity, coupled to movement of ... | 81   | 8   | 3.72   | 0.031 |
| 12 | GO:0015399 | primary active transmembrane transporter... | 83   | 8   | 3.81   | 0.035 |
| 13 | GO:0015405 | P-P-bond-hydrolysis-driven transmembrane... | 83   | 8   | 3.81   | 0.035 |
| 14 | GO:0005488 | binding                                     | 2931 | 146 | 134.57 | 0.036 |
| 15 | GO:0046914 | transition metal ion binding                | 347  | 23  | 15.93  | 0.044 |

#### C. *Crithidia bombi*, Switzerland strains

##### Biological process

|   |            |                                          |     |    |       |         |
|---|------------|------------------------------------------|-----|----|-------|---------|
| 1 | GO:0055114 | oxidation-reduction process              | 252 | 46 | 26.31 | 5.6e-05 |
| 2 | GO:0030100 | regulation of endocytosis                | 6   | 4  | 0.63  | 0.0015  |
| 3 | GO:0006801 | superoxide metabolic process             | 9   | 4  | 0.94  | 0.0096  |
| 4 | GO:0060627 | regulation of vesicle-mediated transport | 9   | 4  | 0.94  | 0.0096  |

##### Molecular function

|    |            |                                             |     |    |       |         |
|----|------------|---------------------------------------------|-----|----|-------|---------|
| 1  | GO:0016491 | oxidoreductase activity                     | 306 | 52 | 30.25 | 3.7e-05 |
| 2  | GO:0030234 | enzyme regulator activity                   | 37  | 11 | 3.66  | 0.00060 |
| 3  | GO:0046906 | tetrapyrrole binding                        | 44  | 12 | 4.35  | 0.00081 |
| 4  | GO:0004784 | superoxide dismutase activity               | 6   | 4  | 0.59  | 0.00120 |
| 5  | GO:0016721 | oxidoreductase activity, acting on super... | 6   | 4  | 0.59  | 0.00120 |
| 6  | GO:0019904 | protein domain specific binding             | 14  | 6  | 1.38  | 0.00135 |
| 7  | GO:0020037 | heme binding                                | 41  | 11 | 4.05  | 0.00155 |
| 8  | GO:0005198 | structural molecule activity                | 153 | 27 | 15.12 | 0.00174 |
| 9  | GO:0048037 | cofactor binding                            | 201 | 33 | 19.87 | 0.00197 |
| 10 | GO:0098772 | molecular function regulator                | 45  | 11 | 4.45  | 0.00347 |
| 11 | GO:0019887 | protein kinase regulator activity           | 12  | 5  | 1.19  | 0.00404 |
| 12 | GO:0016616 | oxidoreductase activity, acting on the C... | 48  | 11 | 4.74  | 0.00590 |
| 13 | GO:0019207 | kinase regulator activity                   | 13  | 5  | 1.29  | 0.00604 |
| 14 | GO:0045309 | protein phosphorylated amino acid bindin... | 2   | 2  | 0.20  | 0.00975 |

#### D. *Crithidia bombi*, Alaskan strains

##### Biological process

|    |            |                                             |     |    |       |         |
|----|------------|---------------------------------------------|-----|----|-------|---------|
| 1  | GO:0044085 | cellular component biogenesis               | 172 | 48 | 27.78 | 3.9e-05 |
| 2  | GO:0044283 | small molecule biosynthetic process         | 150 | 42 | 24.23 | 0.00011 |
| 3  | GO:0032504 | multicellular organism reproduction         | 29  | 13 | 4.68  | 0.00024 |
| 4  | GO:0048609 | multicellular organismal reproductive pr... | 29  | 13 | 4.68  | 0.00024 |
| 5  | GO:0009636 | response to toxic substance                 | 16  | 9  | 2.58  | 0.00027 |
| 6  | GO:0044703 | multi-organism reproductive process         | 30  | 13 | 4.85  | 0.00036 |
| 7  | GO:0006913 | nucleocytoplasmic transport                 | 34  | 14 | 5.49  | 0.00041 |
| 8  | GO:0051169 | nuclear transport                           | 34  | 14 | 5.49  | 0.00041 |
| 9  | GO:0019953 | sexual reproduction                         | 28  | 12 | 4.52  | 0.00069 |
| 10 | GO:0002164 | larval development                          | 32  | 13 | 5.17  | 0.00077 |

##### Molecular function

|   |            |                                                     |    |    |       |        |
|---|------------|-----------------------------------------------------|----|----|-------|--------|
| 1 | GO:0009922 | fatty acid elongase activity                        | 10 | 6  | 1.48  | 0.0013 |
| 2 | GO:0003743 | translation initiation factor activity              | 31 | 11 | 4.60  | 0.0035 |
| 3 | GO:0016747 | transferase activity, transferring acyl groups othe | 74 | 20 | 10.97 | 0.0043 |
| 4 | GO:0051537 | 2 iron, 2 sulfur cluster binding                    | 10 | 5  | 1.48  | 0.0093 |

#### E. *Crithidia bombi*, all strains

##### Biological process

|    |            |                                          |     |     |        |         |
|----|------------|------------------------------------------|-----|-----|--------|---------|
| 1  | GO:0007018 | microtubule-based movement               | 92  | 75  | 58.47  | 0.00011 |
| 2  | GO:0006259 | DNA metabolic process                    | 176 | 134 | 111.85 | 0.00016 |
| 3  | GO:0006281 | DNA repair                               | 99  | 79  | 62.92  | 0.00029 |
| 4  | GO:0009100 | glycoprotein metabolic process           | 23  | 22  | 14.62  | 0.00040 |
| 5  | GO:0090304 | nucleic acid metabolic process           | 455 | 320 | 289.17 | 0.00053 |
| 6  | GO:0006486 | protein glycosylation                    | 22  | 21  | 13.98  | 0.00061 |
| 7  | GO:0009101 | glycoprotein biosynthetic process        | 22  | 21  | 13.98  | 0.00061 |
| 8  | GO:0043413 | macromolecule glycosylation              | 22  | 21  | 13.98  | 0.00061 |
| 9  | GO:0070085 | glycosylation                            | 24  | 22  | 15.25  | 0.00192 |
| 10 | GO:0006974 | cellular response to DNA damage stimulus | 117 | 89  | 74.36  | 0.00219 |
| 11 | GO:0043412 | macromolecule modification               | 463 | 321 | 294.25 | 0.00251 |
| 12 | GO:0006464 | cellular protein modification process    | 412 | 287 | 261.84 | 0.00284 |
| 13 | GO:0036211 | protein modification process             | 412 | 287 | 261.84 | 0.00284 |
| 14 | GO:0006508 | proteolysis                              | 205 | 147 | 130.28 | 0.00653 |

##### Molecular function

|   |            |                               |     |     |        |         |
|---|------------|-------------------------------|-----|-----|--------|---------|
| 1 | GO:0030554 | adenyl nucleotide binding     | 649 | 501 | 430.84 | 2.6e-11 |
| 2 | GO:0032559 | adenyl ribonucleotide binding | 637 | 492 | 422.88 | 3.6e-11 |
| 3 | GO:0005524 | ATP binding                   | 633 | 489 | 420.22 | 4.0e-11 |
| 4 | GO:0008144 | drug binding                  | 676 | 516 | 448.77 | 3.3e-10 |
| 5 | GO:0043168 | anion binding                 | 846 | 628 | 561.62 | 1.2e-08 |

|               |                                             |      |              |         |
|---------------|---------------------------------------------|------|--------------|---------|
| 6 GO:0097367  | carbohydrate derivative binding             | 748  | 558 496.57   | 3.4e-08 |
| 7 GO:0032553  | ribonucleotide binding                      | 743  | 554 493.25   | 4.4e-08 |
| 8 GO:0032555  | purine ribonucleotide binding               | 731  | 545 485.28   | 6.1e-08 |
| 9 GO:0017076  | purine nucleotide binding                   | 744  | 554 493.91   | 6.2e-08 |
| 10 GO:0035639 | purine ribonucleoside triphosphate bindi... | 727  | 542 482.63   | 6.8e-08 |
| 11 GO:0005488 | binding                                     | 2542 | 1755 1687.53 | 9.1e-08 |
| 12 GO:0016787 | hydrolase activity                          | 895  | 651 594.15   | 1.6e-06 |
| 13 GO:0036094 | small molecule binding                      | 962  | 696 638.63   | 2.2e-06 |
| 14 GO:0000166 | nucleotide binding                          | 913  | 661 606.10   | 4.0e-06 |
| 15 GO:1901265 | nucleoside phosphate binding                | 913  | 661 606.10   | 4.0e-06 |
| 16 GO:0017111 | nucleoside-triphosphatase activity          | 387  | 295 256.91   | 5.7e-06 |
| 17 GO:0016462 | pyrophosphatase activity                    | 394  | 299 261.56   | 9.5e-06 |
| 18 GO:0016818 | hydrolase activity, acting on acid anhyd... | 395  | 299 262.22   | 1.4e-05 |
| 19 GO:0016817 | hydrolase activity, acting on acid anhyd... | 398  | 301 264.22   | 1.5e-05 |
| 20 GO:0003774 | motor activity                              | 83   | 72 55.10     | 1.8e-05 |
| 21 GO:0043167 | ion binding                                 | 1320 | 932 876.29   | 2.3e-05 |
| 22 GO:0003777 | microtubule motor activity                  | 79   | 68 52.44     | 5.5e-05 |
| 23 GO:0005515 | protein binding                             | 1053 | 746 699.04   | 0.00014 |
| 24 GO:0008017 | microtubule binding                         | 68   | 57 45.14     | 0.00097 |
| 25 GO:0004386 | helicase activity                           | 97   | 78 64.39     | 0.00151 |
| 26 GO:0015631 | tubulin binding                             | 70   | 58 46.47     | 0.00157 |
| 27 GO:0016887 | ATPase activity                             | 189  | 144 125.47   | 0.00174 |
| 28 GO:0008237 | metallopeptidase activity                   | 47   | 40 31.20     | 0.00323 |
| 29 GO:0004806 | triglyceride lipase activity                | 13   | 13 8.63      | 0.00481 |
| 30 GO:0008236 | serine-type peptidase activity              | 18   | 17 11.95     | 0.00625 |
| 31 GO:0017171 | serine hydrolase activity                   | 18   | 17 11.95     | 0.00625 |
| 32 GO:0003690 | double-stranded DNA binding                 | 12   | 12 7.97      | 0.00726 |

#### F. *Crithidia expoeki*, Switzerland strains

##### Biological process

|               |                                             |      |            |         |
|---------------|---------------------------------------------|------|------------|---------|
| 1 GO:0042180  | cellular ketone metabolic process           | 19   | 8 1.48     | 4.4e-05 |
| 2 GO:0006744  | ubiquinone biosynthetic process             | 15   | 7 1.17     | 6.2e-05 |
| 3 GO:0042181  | ketone biosynthetic process                 | 15   | 7 1.17     | 6.2e-05 |
| 4 GO:1901663  | quinone biosynthetic process                | 15   | 7 1.17     | 6.2e-05 |
| 5 GO:0006120  | mitochondrial electron transport, NADH t... | 11   | 6 0.86     | 7.1e-05 |
| 6 GO:0006743  | ubiquinone metabolic process                | 16   | 7 1.25     | 0.00010 |
| 7 GO:1901661  | quinone metabolic process                   | 16   | 7 1.25     | 0.00010 |
| 8 GO:0006814  | sodium ion transport                        | 13   | 6 1.02     | 0.00023 |
| 9 GO:0018205  | peptidyl-lysine modification                | 25   | 8 1.95     | 0.00042 |
| 10 GO:0022904 | respiratory electron transport chain        | 28   | 7 2.19     | 0.00467 |
| 11 GO:0042773 | ATP synthesis coupled electron transport    | 28   | 7 2.19     | 0.00467 |
| 12 GO:0042775 | mitochondrial ATP synthesis coupled elec... | 28   | 7 2.19     | 0.00467 |
| 13 GO:0022900 | electron transport chain                    | 29   | 7 2.27     | 0.00576 |
| 14 GO:0002182 | cytoplasmic translational elongation        | 6    | 3 0.47     | 0.00790 |
| 15 GO:0008612 | peptidyl-lysine modification to peptidyl... | 6    | 3 0.47     | 0.00790 |
| 16 GO:1900247 | regulation of cytoplasmic translational ... | 6    | 3 0.47     | 0.00790 |
| 17 GO:2000765 | regulation of cytoplasmic translation       | 6    | 3 0.47     | 0.00790 |
| 18 GO:0030001 | metal ion transport                         | 46   | 9 3.59     | 0.00800 |
| 19 GO:0044237 | cellular metabolic process                  | 2147 | 187 167.78 | 0.00825 |

##### Molecular function

|               |                                             |    |         |         |
|---------------|---------------------------------------------|----|---------|---------|
| 1 GO:0003954  | NADH dehydrogenase activity                 | 12 | 7 0.94  | 9.4e-06 |
| 2 GO:0008137  | NADH dehydrogenase (ubiquinone) activity    | 11 | 6 0.86  | 7.2e-05 |
| 3 GO:0050136  | NADH dehydrogenase (quinone) activity       | 11 | 6 0.86  | 7.2e-05 |
| 4 GO:0016811  | hydrolase activity, acting on carbon-nit... | 31 | 9 2.42  | 0.00042 |
| 5 GO:0016651  | oxidoreductase activity, acting on NAD(P... | 38 | 9 2.97  | 0.00207 |
| 6 GO:0016655  | oxidoreductase activity, acting on NAD(P... | 19 | 6 1.48  | 0.00246 |
| 7 GO:0051539  | 4 iron, 4 sulfur cluster binding            | 9  | 4 0.70  | 0.00336 |
| 8 GO:0016810  | hydrolase activity, acting on carbon-nit... | 56 | 11 4.38 | 0.00341 |
| 9 GO:0016209  | antioxidant activity                        | 22 | 6 1.72  | 0.00553 |
| 10 GO:0051536 | iron-sulfur cluster binding                 | 36 | 8 2.81  | 0.00554 |
| 11 GO:0051540 | metal cluster binding                       | 36 | 8 2.81  | 0.00554 |
| 12 GO:0004743 | pyruvate kinase activity                    | 2  | 2 0.16  | 0.00609 |
| 13 GO:0030955 | potassium ion binding                       | 2  | 2 0.16  | 0.00609 |
| 14 GO:0031420 | alkali metal ion binding                    | 2  | 2 0.16  | 0.00609 |
| 15 GO:0042586 | peptide deformylase activity                | 2  | 2 0.16  | 0.00609 |

#### I. *Crithidia expoeki*, Alaskan strains

##### Biological process

|              |                             |     |            |         |
|--------------|-----------------------------|-----|------------|---------|
| 1 GO:0017004 | cytochrome complex assembly | 8   | 7 2.30     | 0.00095 |
| 2 GO:0043412 | macromolecule modification  | 533 | 179 152.92 | 0.00431 |
| 3 GO:0098771 | inorganic ion homeostasis   | 16  | 10 4.59    | 0.00493 |

|    |            |                                             |     |     |        |         |
|----|------------|---------------------------------------------|-----|-----|--------|---------|
| 4  | GO:0006810 | transport                                   | 566 | 188 | 162.39 | 0.00590 |
| 5  | GO:0051234 | establishment of localization               | 570 | 189 | 163.54 | 0.00627 |
| 6  | GO:0055085 | transmembrane transport                     | 201 | 74  | 57.67  | 0.00632 |
| 7  | GO:0051179 | localization                                | 624 | 205 | 179.03 | 0.00696 |
| 8  | GO:0009069 | serine family amino acid metabolic proce... | 194 | 71  | 55.66  | 0.00868 |
| 9  | GO:0033108 | mitochondrial respiratory chain complex ... | 6   | 5   | 1.72   | 0.00882 |
| 10 | GO:0006468 | protein phosphorylation                     | 204 | 74  | 58.53  | 0.00950 |

#### Molecular function

|   |            |                                             |      |     |        |         |
|---|------------|---------------------------------------------|------|-----|--------|---------|
| 1 | GO:0005515 | protein binding                             | 1005 | 360 | 308.51 | 3.6e-05 |
| 2 | GO:0016667 | oxidoreductase activity, acting on a sul... | 35   | 20  | 10.74  | 0.0010  |
| 3 | GO:0003747 | translation release factor activity         | 5    | 5   | 1.53   | 0.0027  |
| 4 | GO:0008079 | translation termination factor activity     | 5    | 5   | 1.53   | 0.0027  |
| 5 | GO:0015036 | disulfide oxidoreductase activity           | 27   | 15  | 8.29   | 0.0061  |
| 6 | GO:0005388 | calcium-transporting ATPase activity        | 4    | 4   | 1.23   | 0.0089  |
| 7 | GO:0015085 | calcium ion transmembrane transporter ac... | 4    | 4   | 1.23   | 0.0089  |

#### *J. Crithidia expoeki*, all strains

##### Biological process

|    |            |                                             |      |     |        |         |
|----|------------|---------------------------------------------|------|-----|--------|---------|
| 1  | GO:0043412 | macromolecule modification                  | 533  | 157 | 116.48 | 4.9e-06 |
| 2  | GO:0007018 | microtubule-based movement                  | 97   | 38  | 21.20  | 6.8e-05 |
| 3  | GO:0006974 | cellular response to DNA damage stimulus    | 88   | 35  | 19.23  | 9.2e-05 |
| 4  | GO:0006281 | DNA repair                                  | 82   | 33  | 17.92  | 0.00011 |
| 5  | GO:0006259 | DNA metabolic process                       | 172  | 58  | 37.59  | 0.00016 |
| 6  | GO:0090304 | nucleic acid metabolic process              | 534  | 149 | 116.70 | 0.00021 |
| 7  | GO:0006928 | movement of cell or subcellular componen... | 131  | 46  | 28.63  | 0.00027 |
| 8  | GO:0070647 | protein modification by small protein co... | 54   | 23  | 11.80  | 0.00046 |
| 9  | GO:0009451 | RNA modification                            | 75   | 29  | 16.39  | 0.00063 |
| 10 | GO:0006464 | cellular protein modification process       | 459  | 128 | 100.31 | 0.00065 |
| 11 | GO:0036211 | protein modification process                | 459  | 128 | 100.31 | 0.00065 |
| 12 | GO:0016579 | protein deubiquitination                    | 19   | 11  | 4.15   | 0.00067 |
| 13 | GO:0070646 | protein modification by small protein re... | 19   | 11  | 4.15   | 0.00067 |
| 14 | GO:0009069 | serine family amino acid metabolic proce... | 194  | 61  | 42.40  | 0.00091 |
| 15 | GO:0000723 | telomere maintenance                        | 12   | 8   | 2.62   | 0.00107 |
| 16 | GO:0032200 | telomere organization                       | 12   | 8   | 2.62   | 0.00107 |
| 17 | GO:0010038 | response to metal ion                       | 8    | 6   | 1.75   | 0.00199 |
| 18 | GO:0006468 | protein phosphorylation                     | 204  | 62  | 44.58  | 0.00213 |
| 19 | GO:0033554 | cellular response to stress                 | 109  | 37  | 23.82  | 0.00214 |
| 20 | GO:0032011 | ARF protein signal transduction             | 4    | 4   | 0.87   | 0.00227 |
| 21 | GO:0032012 | regulation of ARF protein signal transdu... | 4    | 4   | 0.87   | 0.00227 |
| 22 | GO:0046578 | regulation of Ras protein signal transdu... | 4    | 4   | 0.87   | 0.00227 |
| 23 | GO:0051056 | regulation of small GTPase mediated sign... | 4    | 4   | 0.87   | 0.00227 |
| 24 | GO:0043170 | macromolecule metabolic process             | 1442 | 350 | 315.12 | 0.00237 |
| 25 | GO:0046834 | lipid phosphorylation                       | 6    | 5   | 1.31   | 0.00242 |
| 26 | GO:0046854 | phosphatidylinositol phosphorylation        | 6    | 5   | 1.31   | 0.00242 |
| 27 | GO:0030258 | lipid modification                          | 14   | 8   | 3.06   | 0.00425 |
| 28 | GO:0060249 | anatomical structure homeostasis            | 14   | 8   | 3.06   | 0.00425 |
| 29 | GO:0001522 | pseudouridine synthesis                     | 26   | 12  | 5.68   | 0.00493 |
| 30 | GO:0006260 | DNA replication                             | 67   | 24  | 14.64  | 0.00585 |
| 31 | GO:0009187 | cyclic nucleotide metabolic process         | 15   | 8   | 3.28   | 0.00738 |
| 32 | GO:0009190 | cyclic nucleotide biosynthetic process      | 15   | 8   | 3.28   | 0.00738 |
| 33 | GO:0007017 | microtubule-based process                   | 163  | 49  | 35.62  | 0.00764 |
| 34 | GO:0006644 | phospholipid metabolic process              | 73   | 25  | 15.95  | 0.00949 |

##### Molecular function

|    |            |                                             |      |     |        |         |
|----|------------|---------------------------------------------|------|-----|--------|---------|
| 1  | GO:0008144 | drug binding                                | 756  | 242 | 181.00 | 1.3e-08 |
| 2  | GO:0030554 | adenyl nucleotide binding                   | 730  | 234 | 174.78 | 2.2e-08 |
| 3  | GO:0032559 | adenyl ribonucleotide binding               | 718  | 230 | 171.91 | 3.3e-08 |
| 4  | GO:0005524 | ATP binding                                 | 717  | 229 | 171.67 | 4.8e-08 |
| 5  | GO:0016817 | hydrolase activity, acting on acid anhyd... | 468  | 156 | 112.05 | 6.4e-07 |
| 6  | GO:0017111 | nucleoside-triphosphatase activity          | 455  | 152 | 108.94 | 7.9e-07 |
| 7  | GO:0016462 | pyrophosphatase activity                    | 462  | 153 | 110.61 | 1.3e-06 |
| 8  | GO:0004386 | helicase activity                           | 102  | 46  | 24.42  | 1.7e-06 |
| 9  | GO:0016887 | ATPase activity                             | 237  | 88  | 56.74  | 2.0e-06 |
| 10 | GO:0016818 | hydrolase activity, acting on acid anhyd... | 465  | 153 | 111.33 | 2.0e-06 |
| 11 | GO:0017076 | purine nucleotide binding                   | 852  | 255 | 203.99 | 3.9e-06 |
| 12 | GO:0032555 | purine ribonucleotide binding               | 839  | 251 | 200.88 | 5.1e-06 |
| 13 | GO:0035639 | purine ribonucleoside triphosphate bindi... | 838  | 250 | 200.64 | 6.8e-06 |
| 14 | GO:0016787 | hydrolase activity                          | 1028 | 297 | 246.13 | 1.4e-05 |
| 15 | GO:0008026 | ATP-dependent helicase activity             | 74   | 34  | 17.72  | 2.4e-05 |
| 16 | GO:0070035 | purine NTP-dependent helicase activity      | 74   | 34  | 17.72  | 2.4e-05 |
| 17 | GO:0097367 | carbohydrate derivative binding             | 901  | 260 | 215.72 | 7.0e-05 |
| 18 | GO:0032553 | ribonucleotide binding                      | 897  | 257 | 214.76 | 0.00014 |

|               |                                             |      |     |        |         |
|---------------|---------------------------------------------|------|-----|--------|---------|
| 19 GO:0003777 | microtubule motor activity                  | 83   | 35  | 19.87  | 0.00016 |
| 20 GO:0140097 | catalytic activity, acting on DNA           | 70   | 30  | 16.76  | 0.00034 |
| 21 GO:0005488 | binding                                     | 2931 | 744 | 701.75 | 0.00039 |
| 22 GO:0005515 | protein binding                             | 1005 | 279 | 240.62 | 0.00073 |
| 23 GO:0003774 | motor activity                              | 89   | 35  | 21.31  | 0.00080 |
| 24 GO:0051020 | GTPase binding                              | 11   | 8   | 2.63   | 0.00086 |
| 25 GO:0043168 | anion binding                               | 1032 | 282 | 247.08 | 0.00205 |
| 26 GO:0003678 | DNA helicase activity                       | 25   | 13  | 5.99   | 0.00216 |
| 27 GO:0042623 | ATPase activity, coupled                    | 192  | 63  | 45.97  | 0.00271 |
| 28 GO:0005086 | ARF guanyl-nucleotide exchange factor ac... | 4    | 4   | 0.96   | 0.00327 |
| 29 GO:0004672 | protein kinase activity                     | 190  | 62  | 45.49  | 0.00338 |
| 30 GO:0004518 | nuclease activity                           | 84   | 31  | 20.11  | 0.00495 |
| 31 GO:0000166 | nucleotide binding                          | 1107 | 297 | 265.04 | 0.00510 |
| 32 GO:1901265 | nucleoside phosphate binding                | 1107 | 297 | 265.04 | 0.00510 |
| 33 GO:0004527 | exonuclease activity                        | 36   | 16  | 8.62   | 0.00533 |
| 34 GO:0140098 | catalytic activity, acting on RNA           | 126  | 43  | 30.17  | 0.00567 |
| 35 GO:0016773 | phosphotransferase activity, alcohol gro... | 249  | 77  | 59.62  | 0.00573 |
| 36 GO:0016866 | intramolecular transferase activity         | 31   | 14  | 7.42   | 0.00756 |
| 37 GO:0016849 | phosphorus-oxygen lyase activity            | 14   | 8   | 3.35   | 0.00773 |
| 38 GO:0036094 | small molecule binding                      | 1183 | 313 | 283.24 | 0.00954 |
