# Supplementary material for: Genomic Variation among Strains of Crithidia bombi and C. expoeki
Source: mSphere. 2019 Sep 11;4(5):e00482-19. doi: 10.1128/mSphere.00482-19 (PMC6739494; doi:10.1128/mSphere.00482-19)
Supplement: TABLE S3 [file mSphere.00482-19-st003.pdf]

Gene expression data visualization showing a heatmap of expression levels across various samples (columns) and genes (rows). The color scale ranges from blue (low expression) to red (high expression). The data is organized into a grid where each cell's color indicates the expression level of a specific gene in a specific sample. The grid is divided into several vertical sections, each containing a list of gene names. The gene names are abbreviated, often followed by a number in parentheses, indicating a specific isoform or variant. The overall pattern shows varying levels of expression across the different samples, with some genes showing high expression in multiple samples and others showing low expression. The color intensity is most prominent in the central and right-hand sections of the grid.

[illegible]
