# Supplementary material for: Genomic Variation among Strains of Crithidia bombi and C. expoeki
Source: mSphere. 2019 Sep 11;4(5):e00482-19. doi: 10.1128/mSphere.00482-19 (PMC6739494; doi:10.1128/mSphere.00482-19)
Supplement: TABLE S4 [file mSphere.00482-19-st004.pdf]

| chrom       | start  | end    | width | AK08_209 | AK08_287 | AK08_539 | AK08_599 | BJ08_064 | BJ08_074 | BJ08_083 | BJ08_162 | BJ08_163 | BJ08_168 | BJ08_172 | BJ08_175 | BJ08_193 | Genes overlapping the region |
|-------------|--------|--------|-------|----------|----------|----------|----------|----------|----------|----------|----------|----------|----------|----------|----------|----------|------------------------------|
| ENAJ0ESE01C | 1      | 6000   | 6000  | 1        | 1        | 1        | 1        | 1        | 2        | 2        | 2        | 2        | 4        | 2        | 2        | 2        | 2                            |
| ENAJ0ESE01C | 37801  | 38700  | 900   | 2        | 2        | 2        | 2        | 2        | 2        | 2        | 2        | 2        | 1        | 2        | 2        | 2        | 2                            |
| ENAJ0ESE01C | 3901   | 4800   | 900   | 2        | 2        | 2        | 2        | 2        | 2        | 2        | 2        | 1        | 2        | 2        | 2        | 2        | 2                            |
| ENAJ0ESE01C | 7201   | 8100   | 900   | 2        | 2        | 2        | 2        | 2        | 2        | 2        | 0        | 2        | 2        | 2        | 2        | 2        | 2                            |
| ENAJ0ESE01C | 119101 | 130085 | 10985 | 2        | 2        | 2        | 2        | 2        | 2        | 2        | 2        | 3        | 2        | 2        | 2        | 2        | 2                            |
| ENAJ0ESE01C | 46501  | 49200  | 2700  | 4        | 2        | 4        | 2        | 2        | 2        | 2        | 2        | 2        | 2        | 2        | 2        | 2        | 4                            |
| ENAJ0ESE01C | 51001  | 53400  | 2400  | 4        | 2        | 4        | 2        | 2        | 2        | 2        | 2        | 2        | 2        | 2        | 2        | 2        | 2                            |
| ENAJ0ESE01C | 129001 | 129900 | 900   | 0        | 2        | 0        | 2        | 2        | 2        | 2        | 2        | 2        | 2        | 2        | 2        | 2        | 2                            |
| ENAJ0ESE01C | 41101  | 42300  | 1200  | 2        | 2        | 2        | 2        | 2        | 2        | 2        | 2        | 1        | 2        | 2        | 2        | 2        | 2                            |
| ENAJ0ESE01C | 87901  | 89700  | 1800  | 2        | 2        | 2        | 2        | 2        | 2        | 2        | 2        | 2        | 4        | 2        | 2        | 2        | 2                            |
| ENAJ0ESE01C | 133201 | 134400 | 1200  | 2        | 2        | 2        | 2        | 2        | 2        | 2        | 2        | 2        | 2        | 2        | 2        | 2        | 2                            |
| ENAJ0ESE01C | 153901 | 157437 | 3537  | 1        | 1        | 1        | 1        | 2        | 2        | 2        | 2        | 2        | 2        | 2        | 2        | 2        | 2                            |
| ENAJ0ESE01C | 153901 | 154800 | 900   | 2        | 1        | 2        | 2        | 2        | 2        | 2        | 2        | 2        | 2        | 2        | 2        | 2        | 2                            |
| ENAJ0ESE01C | 1      | 11700  | 11700 | 2        | 2        | 2        | 1        | 2        | 2        | 2        | 2        | 2        | 2        | 1        | 2        | 2        | 2                            |
| ENAJ0ESE01C | 170401 | 171300 | 900   | 2        | 0        | 2        | 2        | 2        | 2        | 2        | 2        | 2        | 2        | 2        | 2        | 2        | 2                            |
| ENAJ0ESE01C | 1      | 1800   | 1800  | 2        | 2        | 2        | 2        | 1        | 2        | 2        | 2        | 2        | 2        | 2        | 2        | 2        | 2                            |
| ENAJ0ESE01C | 158401 | 159600 | 1200  | 2        | 2        | 2        | 2        | 2        | 2        | 2        | 2        | 2        | 2        | 2        | 2        | 1        | 2                            |
| ENAJ0ESE01C | 168301 | 169500 | 1200  | 2        | 2        | 2        | 0        | 2        | 2        | 2        | 2        | 2        | 2        | 2        | 2        | 2        | 2                            |
| ENAJ0ESE01C | 1      | 8100   | 8100  | 1        | 2        | 2        | 2        | 2        | 2        | 2        | 2        | 2        | 2        | 2        | 2        | 2        | 2                            |
| ENAJ0ESE01C | 112801 | 113700 | 900   | 2        | 2        | 2        | 2        | 2        | 2        | 2        | 2        | 1        | 2        | 2        | 2        | 2        | 2                            |
| ENAJ0ESE01C | 144601 | 146400 | 1800  | 4        | 2        | 4        | 3        | 2        | 2        | 2        | 2        | 2        | 2        | 2        | 2        | 2        | 2                            |
| ENAJ0ESE01C | 1      | 8100   | 8100  | 1        | 2        | 1        | 1        | 2        | 2        | 1        | 2        | 2        | 2        | 2        | 2        | 2        | 2                            |
| ENAJ0ESE01C | 8701   | 9900   | 1200  | 2        | 2        | 2        | 2        | 2        | 2        | 2        | 2        | 2        | 3        | 2        | 2        | 2        | 2                            |
| ENAJ0ESE01C | 35101  | 36000  | 900   | 2        | 2        | 2        | 2        | 2        | 2        | 2        | 2        | 1        | 2        | 2        | 2        | 2        | 1                            |
| ENAJ0ESE01C | 38401  | 40200  | 1800  | 2        | 2        | 2        | 2        | 2        | 2        | 2        | 2        | 3        | 2        | 2        | 2        | 2        | 2                            |
| ENAJ0ESE01C | 75601  | 76800  | 1200  | 2        | 2        | 2        | 2        | 2        | 2        | 2        | 2        | 2        | 2        | 2        | 2        | 2        | 1                            |
| ENAJ0ESE01C | 99601  | 102600 | 3000  | 2        | 2        | 2        | 2        | 2        | 2        | 2        | 2        | 1        | 2        | 2        | 2        | 2        | 2                            |
| ENAJ0ESE01C | 236101 | 237300 | 1200  | 2        | 2        | 2        | 2        | 2        | 2        | 2        | 2        | 2        | 2        | 4        | 2        | 2        | 2                            |
| ENAJ0ESE01C | 7501   | 8700   | 1200  | 2        | 2        | 3        | 3        | 2        | 1        | 2        | 2        | 2        | 1        | 2        | 2        | 2        | 2                            |
| ENAJ0ESE01C | 123601 | 127200 | 3600  | 3        | 2        | 2        | 2        | 2        | 2        | 2        | 2        | 2        | 2        | 2        | 2        | 2        | 2                            |
| ENAJ0ESE01C | 219601 | 240329 | 20729 | 1        | 2        | 2        | 2        | 2        | 2        | 2        | 2        | 2        | 2        | 2        | 2        | 2        | 2                            |
| ENAJ0ESE01C | 139201 | 143100 | 3900  | 2        | 2        | 2        | 2        | 2        | 2        | 2        | 2        | 1        | 2        | 2        | 2        | 2        | 2                            |
| ENAJ0ESE01C | 203101 | 204000 | 900   | 2        | 2        | 2        | 2        | 2        | 2        | 2        | 2        | 8        | 2        | 2        | 2        | 2        | 2                            |
| ENAJ0ESE01C | 228301 | 229200 | 900   | 2        | 2        | 2        | 2        | 2        | 2        | 2        | 2        | 1        | 2        | 2        | 2        | 2        | 2                            |
| ENAJ0ESE01C | 6601   | 7800   | 1200  | 2        | 0        | 0        | 0        | 2        | 2        | 2        | 2        | 2        | 2        | 2        | 2        | 2        | 2                            |
| ENAJ0ESE01C | 65101  | 70500  | 5400  | 2        | 3        | 3        | 4        | 2        | 1        | 6        | 2        | 1        | 1        | 2        | 1        | 1        | 1                            |
| ENAJ0ESE01C | 131701 | 146700 | 15000 | 2        | 2        | 2        | 2        | 2        | 2        | 1        | 2        | 2        | 2        | 2        | 2        | 2        | 2                            |
| ENAJ0ESE01C | 276901 | 287100 | 10200 | 2        | 2        | 2        | 2        | 2        | 2        | 2        | 2        | 3        | 2        | 2        | 2        | 2        | 4                            |
| ENAJ0ESE01C | 1      | 3000   | 3000  | 2        | 2        | 2        | 2        | 0        | 2        | 8        | 2        | 2        | 2        | 2        | 2        | 2        | 2                            |
| ENAJ0ESE01C | 300301 | 301967 | 1667  | 2        | 2        | 2        | 2        | 2        | 2        | 2        | 2        | 2        | 2        | 2        | 2        | 2        | 1                            |
| ENAJ0ESE01C | 11101  | 13200  | 2100  | 2        | 2        | 2        | 2        | 2        | 1        | 2        | 2        | 2        | 1        | 2        | 2        | 2        | 2                            |
| ENAJ0ESE01C | 273001 | 302100 | 29100 | 1        | 2        | 2        | 2        | 2        | 2        | 2        | 2        | 2        | 2        | 2        | 2        | 2        | 2                            |
| ENAJ0ESE01C | 1      | 2400   | 2400  | 2        | 2        | 2        | 2        | 2        | 2        | 2        | 2        | 2        | 2        | 2        | 2        | 2        | 2                            |
| ENAJ0ESE01C | 3901   | 5100   | 1200  | 0        | 0        | 0        | 0        | 2        | 2        | 2        | 2        | 2        | 2        | 2        | 2        | 2        | 2                            |
| ENAJ0ESE01C | 202801 | 204300 | 1500  | 2        | 2        | 2        | 2        | 2        | 2        | 2        | 2        | 0        | 2        | 2        | 2        | 2        | 1                            |
| ENAJ0ESE01C | 270601 | 271800 | 1200  | 2        | 2        | 2        | 2        | 2        | 2        | 2        | 2        | 1        | 2        | 2        | 2        | 2        | 2                            |
| ENAJ0ESE01C | 210001 | 211500 | 1500  | 2        | 2        | 2        | 2        | 3        | 2        | 2        | 2        | 2        | 2        | 2        | 2        | 2        | 2                            |
| ENAJ0ESE01C | 294001 | 295200 | 1200  | 2        | 2        | 2        | 2        | 2        | 2        | 2        | 2        | 1        | 2        | 2        | 2        | 2        | 2                            |
| ENAJ0ESE01C | 343501 | 344400 | 900   | 2        | 2        | 2        | 2        | 2        | 2        | 2        | 2        | 2        | 2        | 2        | 4        | 2        | 2                            |
| ENAJ0ESE01C | 1      | 4500   | 4500  | 1        | 1        | 1        | 1        | 2        | 2        | 2        | 2        | 2        | 2        | 2        | 2        | 2        | 2                            |
| ENAJ0ESE01C | 154501 | 155700 | 1200  | 2        | 2        | 2        | 2        | 2        | 2        | 2        | 2        | 1        | 2        | 2        | 2        | 2        | 1                            |
| ENAJ0ESE01C | 207901 | 234000 | 26100 | 1        | 2        | 5        | 2        | 1        | 3        | 0        | 2        | 1        | 1        | 2        | 2        | 2        | 3                            |
| ENAJ0ESE01C | 249301 | 251100 | 1800  | 2        | 2        | 5        | 2        | 2        | 2        | 2        | 2        | 2        | 3        | 2        | 2        | 2        | 2                            |
| ENAJ0ESE01C | 345901 | 347780 | 1880  | 1        | 1        | 1        | 1        | 2        | 2        | 2        | 2        | 2        | 2        | 2        | 2        | 2        | 2                            |
| ENAJ0ESE01C | 1      | 6600   | 6600  | 2        | 2        | 2        | 1        | 3        | 2        | 2        | 2        | 4        | 2        | 3        | 2        | 2        | 2                            |
| ENAJ0ESE01C | 261001 | 264000 | 3000  | 2        | 3        | 3        | 2        | 2        | 2        | 2        | 2        | 2        | 2        | 2        | 2        | 2        | 2                            |
| ENAJ0ESE01C | 359701 | 368400 | 8700  | 2        | 8        | 2        | 6        | 1        | 2        | 1        | 2        | 2        | 2        | 2        | 2        | 2        | 2                            |
| ENAJ0ESE01C | 4501   | 5700   | 1200  | 1        | 2        | 1        | 2        | 2        | 2        | 2        | 2        | 2        | 2        | 2        | 2        | 2        | 2                            |
| ENAJ0ESE01C | 151501 | 154200 | 2700  | 2        | 2        | 2        | 2        | 2        | 2        | 1        | 2        | 2        | 2        | 2        | 2        | 2        | 2                            |
| ENAJ0ESE01C | 173401 | 174300 | 900   | 2        | 2        | 2        | 4        | 2        | 2        | 2        | 2        | 2        | 2        | 2        | 2        | 2        | 2                            |
| ENAJ0ESE01C | 176101 | 182400 | 6300  | 2        | 2        | 2        | 2        | 2        | 2        | 2        | 2        | 2        | 2        | 3        | 2        | 2        | 2                            |
| ENAJ0ESE01C | 367501 | 371352 | 3852  | 2        | 2        | 8        | 2        | 2        | 2        | 1        | 2        | 2        | 2        | 2        | 1        | 2        | 2                            |
| ENAJ0ESE01C | 1      | 6000   | 6000  | 4        | 3        | 3        | 2        | 2        | 2        | 2        | 2        | 2        | 2        | 2        | 2        | 2        | 2                            |
| ENAJ0ESE01C | 170101 | 172800 | 2700  | 2        | 2        | 2        | 2        | 3        | 2        | 2        | 2        | 2        | 2        | 2        | 2        | 2        | 2                            |
| ENAJ0ESE01C | 362401 | 375681 | 13281 | 2        | 1        | 2        | 1        | 2        | 2        | 2        | 2        | 2        | 2        | 2        | 2        | 2        | 2                            |
| ENAJ0ESE01C | 4801   | 10800  | 6000  | 0        | 0        | 0        | 0        | 2        | 2        | 2        | 2        | 2        | 2        | 2        | 2        | 2        | 3                            |
| ENAJ0ESE01C | 263701 | 284700 | 21000 | 2        | 2        | 2        | 3        | 2        | 2        | 2        | 2        | 3        | 5        | 2        | 3        | 1        | 2                            |
| ENAJ0ESE01C | 403201 | 405569 | 2369  | 1        | 2        | 2        | 2        | 2        | 2        | 2        | 2        | 2        | 2        | 2        | 2        | 2        | 2                            |
| ENAJ0ESE01C | 19801  | 20700  | 900   | 1        | 2        | 2        | 2        | 2        | 2        | 2        | 2        | 2        | 2        | 2        | 2        | 2        | 2                            |
| ENAJ0ESE01C | 180001 | 181200 | 1200  | 2        | 2        | 2        | 2        | 2        | 2        | 2        | 2        | 1        | 2        | 2        | 2        | 2        | 2                            |
| ENAJ0ESE01C | 223801 | 231000 | 7200  | 1        | 2        | 3        | 2        | 2        | 2        | 2        | 2        | 2        | 2        | 2        | 2        | 2        | 3                            |
| ENAJ0ESE01C | 405901 | 407700 | 1800  | 1        | 1        | 1        | 1        | 2        | 2        | 2        | 2        | 2        | 2        | 2        | 2        | 2        | 2                            |
| ENAJ0ESE01C | 417601 | 418800 | 1200  | 2        | 2        | 2        | 2        | 2        | 2        | 2        | 2        | 2        | 4        | 2        | 2        | 2        | 2                            |
| ENAJ0ESE01C | 5401   | 7800   | 2400  | 1        | 1        | 1        | 1        | 0        | 2        | 2        | 2        | 2        | 2        | 2        | 2        | 2        | 2                            |
| ENAJ0ESE01C | 64201  | 69900  | 5700  | 2        | 2        | 2        | 2        | 2        | 2        | 2        | 2        | 4        | 2        | 2        | 2        | 2        | 2                            |
| ENAJ0ESE01C | 294901 | 296100 | 1200  | 2        | 2        | 2        | 2        | 2        | 2        | 2        | 2        | 4        | 2        | 2        | 2        | 2        | 2                            |
| ENAJ0ESE01C | 1      | 15300  | 15300 | 1        | 2        | 2        | 2        | 2        | 4        | 2        | 2        | 2        | 2        | 2        | 2        | 2        | 2                            |
| ENAJ0ESE01C | 407401 | 414900 | 7500  | 2        | 2        | 2        | 2        | 2        | 4        | 1        | 2        | 2        | 4        | 2        | 2        | 2        | 2                            |
| ENAJ0ESE01C | 480501 | 482363 | 1863  | 2        | 2        | 2        | 3        | 2        | 2        | 2        | 2        | 2        | 2        | 2        | 2        | 2        | 2                            |
| ENAJ0ESE01C | 123901 | 126000 | 2100  | 2        | 2        | 2        | 4        | 2        | 2        | 2        | 2        | 2        | 2        | 2        | 2        | 2        | 2                            |
| ENAJ0ESE01C | 139801 | 140700 | 900   | 2        | 2        | 2        | 2        | 2        | 2        | 2        | 2        | 2        | 2        | 2        | 2        | 2        | 2                            |
| ENAJ0ESE01C | 213601 | 216900 | 3300  | 4        | 2        | 2        | 2        | 2        | 2        | 2        | 2        | 2        | 2        | 2        | 2        | 2        | 2                            |
| ENAJ0ESE01C | 485701 | 489488 | 3788  | 2        | 1        | 1        | 0        | 2        | 2        | 2        | 2        | 2        | 2        | 2        | 2        | 2        | 2                            |
| ENAJ0ESE01C | 1      | 1500   | 1500  | 1        | 1        | 1        | 1        | 2        | 2        | 2        | 2        | 2        | 2        | 2        | 2        | 2        | 2                            |
| ENAJ0ESE01C | 194701 | 198000 | 3300  | 2        | 2        | 2        | 2        | 2        | 2        | 2        | 2        | 1        | 2        | 2        | 2        | 2        | 2                            |
| ENAJ0ESE01C | 292501 | 293400 | 900   | 2        | 2        | 2        | 2        | 0        | 2        | 2        | 2        | 2        | 2        | 2        | 2        | 2        | 2                            |
| ENAJ0ESE01C | 155701 | 158100 | 2400  | 2        | 2        | 2        | 2        | 2        | 2        | 1        | 2        | 2        | 2        | 2        | 2        | 2        | 2                            |
| ENAJ0ESE01C | 511201 | 512100 | 900   | 1        | 2        | 2        | 2        | 2        | 2        | 2        | 2        | 2        | 2        | 2        | 2        | 2        | 2                            |
| ENAJ0ESE01C | 102301 | 106200 | 3900  | 2        | 2        | 2        | 2        | 2        | 2        | 2        | 2        | 2        | 2        | 2        | 2        | 3        | 2                            |
| ENAJ0ESE01C | 204001 | 206400 | 2400  | 2        | 2        | 2        | 2        | 2        | 2        | 2        | 2        | 2        | 2        | 2        | 2        | 4        | 2                            |
| ENAJ0ESE01C | 289601 | 298800 | 9000  | 1        | 1        | 1        | 1        | 2        | 2        | 2        | 2        | 2        | 3        | 2        | 3        | 2        | 2                            |
| ENAJ0ESE01C | 389801 | 372600 | 3600  | 4        | 2        | 2        | 2        | 2        | 6        | 2        | 2        | 2        | 2        | 2        | 2        | 2        | 3                            |
| ENAJ0ESE01C | 378601 | 379500 | 900   | 2        | 2        | 2        | 2        | 2        | 2        | 2        | 2        | 2        | 2        | 2        | 2        | 2        | 2                            |
| ENAJ0ESE01C | 380701 | 386400 | 5700  | 3        | 2        | 4        | 3        | 2        | 2        | 2        | 2        | 2        | 2        | 2        | 2        | 2        | 2                            |

|              |         |         |       |   |   |   |   |   |   |   |   |   |     |   |   |   |   |
|--------------|---------|---------|-------|---|---|---|---|---|---|---|---|---|-----|---|---|---|---|
| ENAJ(OESE01C | 36301   | 38400   | 2100  | 2 | 2 | 2 | 3 | 2 | 2 | 2 | 2 | 2 | 2   | 2 | 2 | 2 | 2 |
| ENAJ(OESE01C | 180901  | 183000  | 2100  | 2 | 2 | 2 | 2 | 3 | 3 | 2 | 2 | 2 | 3   | 2 | 2 | 2 | 2 |
| ENAJ(OESE01C | 216901  | 219000  | 2100  | 2 | 2 | 2 | 2 | 3 | 2 | 2 | 2 | 1 | 2   | 2 | 2 | 2 | 2 |
| ENAJ(OESE01C | 235801  | 238500  | 2700  | 2 | 2 | 2 | 2 | 2 | 2 | 2 | 2 | 1 | 2   | 2 | 2 | 2 | 2 |
| ENAJ(OESE01C | 405001  | 432000  | 27000 | 1 | 2 | 2 | 2 | 2 | 2 | 2 | 2 | 2 | 2   | 2 | 2 | 2 | 2 |
| ENAJ(OESE01C | 491701  | 495900  | 4200  | 5 | 3 | 2 | 3 | 2 | 2 | 2 | 2 | 2 | 1   | 2 | 2 | 1 | 1 |
| ENAJ(OESE01C | 563101  | 567600  | 4500  | 5 | 4 | 2 | 5 | 4 | 2 | 2 | 2 | 2 | 2   | 2 | 1 | 2 | 2 |
| ENAJ(OESE01C | 161701  | 165300  | 3600  | 2 | 1 | 2 | 2 | 1 | 2 | 2 | 2 | 2 | 2   | 2 | 2 | 2 | 2 |
| ENAJ(OESE01C | 127801  | 129900  | 2100  | 2 | 2 | 2 | 2 | 2 | 3 | 2 | 2 | 2 | 2   | 2 | 2 | 2 | 2 |
| ENAJ(OESE01C | 306301  | 309300  | 3000  | 2 | 0 | 0 | 0 | 2 | 1 | 2 | 2 | 2 | 2   | 2 | 3 | 2 | 2 |
| ENAJ(OESE01C | 322201  | 325500  | 3300  | 2 | 2 | 4 | 2 | 2 | 2 | 2 | 2 | 2 | 2   | 2 | 3 | 2 | 2 |
| ENAJ(OESE01C | 430201  | 432300  | 2100  | 2 | 2 | 3 | 2 | 2 | 2 | 2 | 2 | 2 | 2   | 2 | 2 | 2 | 2 |
| ENAJ(OESE01C | 1       | 1200    | 1200  | 2 | 7 | 7 | 7 | 2 | 2 | 2 | 2 | 2 | 2   | 2 | 2 | 2 | 2 |
| ENAJ(OESE01C | 126901  | 128700  | 1800  | 2 | 2 | 2 | 2 | 2 | 4 | 2 | 2 | 2 | 2   | 2 | 2 | 2 | 2 |
| ENAJ(OESE01C | 297001  | 297900  | 900   | 2 | 2 | 0 | 2 | 2 | 2 | 2 | 0 | 2 | 2   | 0 | 2 | 2 | 2 |
| ENAJ(OESE01C | 328501  | 333000  | 4500  | 2 | 2 | 5 | 2 | 2 | 2 | 2 | 2 | 2 | 2   | 2 | 3 | 2 | 2 |
| ENAJ(OESE01C | 479101  | 481500  | 2400  | 2 | 2 | 2 | 4 | 2 | 2 | 2 | 2 | 2 | 2   | 2 | 2 | 2 | 2 |
| ENAJ(OESE01C | 482101  | 485700  | 3600  | 2 | 4 | 2 | 2 | 2 | 2 | 2 | 2 | 2 | 2   | 2 | 2 | 2 | 2 |
| ENAJ(OESE01C | 593701  | 601800  | 8100  | 1 | 1 | 2 | 2 | 2 | 2 | 0 | 2 | 2 | 2   | 2 | 2 | 2 | 2 |
| ENAJ(OESE01C | 1       | 12900   | 12900 | 1 | 1 | 1 | 1 | 2 | 2 | 2 | 2 | 2 | 6   | 2 | 2 | 2 | 2 |
| ENAJ(OESE01C | 32101   | 33900   | 1800  | 2 | 2 | 2 | 2 | 2 | 2 | 2 | 2 | 1 | 2   | 2 | 2 | 2 | 2 |
| ENAJ(OESE01C | 82801   | 83700   | 900   | 4 | 2 | 2 | 2 | 2 | 2 | 2 | 2 | 2 | 2   | 2 | 2 | 2 | 2 |
| ENAJ(OESE01C | 453601  | 459900  | 6300  | 2 | 2 | 2 | 2 | 2 | 2 | 2 | 2 | 2 | 2   | 2 | 2 | 2 | 2 |
| ENAJ(OESE01C | 467101  | 469200  | 2100  | 2 | 2 | 3 | 2 | 4 | 2 | 2 | 4 | 4 | 2   | 4 | 2 | 2 | 2 |
| ENAJ(OESE01C | 607801  | 609124  | 1324  | 1 | 2 | 2 | 2 | 2 | 2 | 2 | 2 | 2 | 2   | 2 | 2 | 2 | 2 |
| ENAJ(OESE01C | 510601  | 513900  | 3300  | 2 | 2 | 2 | 2 | 1 | 3 | 2 | 2 | 1 | 1   | 2 | 2 | 1 | 1 |
| ENAJ(OESE01C | 546301  | 547500  | 1200  | 2 | 2 | 2 | 2 | 2 | 2 | 2 | 2 | 2 | 2   | 2 | 2 | 2 | 1 |
| ENAJ(OESE01C | 686701  | 689400  | 2700  | 2 | 2 | 2 | 2 | 2 | 1 | 1 | 2 | 2 | 2   | 2 | 2 | 2 | 2 |
| ENAJ(OESE01C | 210301  | 213300  | 3000  | 4 | 2 | 4 | 2 | 2 | 2 | 2 | 2 | 2 | 2   | 2 | 3 | 2 | 2 |
| ENAJ(OESE01C | 233101  | 234900  | 1800  | 2 | 2 | 2 | 2 | 2 | 2 | 2 | 2 | 2 | 2   | 2 | 2 | 2 | 2 |
| ENAJ(OESE01C | 297301  | 298200  | 900   | 2 | 2 | 2 | 2 | 2 | 2 | 2 | 2 | 1 | 2   | 2 | 2 | 2 | 2 |
| ENAJ(OESE01C | 667901  | 669000  | 1200  | 4 | 2 | 2 | 2 | 2 | 2 | 2 | 2 | 1 | 2   | 2 | 2 | 2 | 2 |
| ENAJ(OESE01C | 146801  | 151500  | 2700  | 2 | 2 | 1 | 2 | 2 | 2 | 2 | 2 | 2 | 2   | 2 | 2 | 2 | 2 |
| ENAJ(OESE01C | 315001  | 316800  | 1800  | 2 | 2 | 2 | 2 | 2 | 2 | 2 | 2 | 2 | 2   | 2 | 2 | 1 | 1 |
| ENAJ(OESE01C | 521701  | 524400  | 2700  | 1 | 2 | 2 | 2 | 2 | 2 | 2 | 2 | 2 | 2   | 2 | 2 | 2 | 2 |
| ENAJ(OESE01C | 695401  | 714600  | 19200 | 2 | 2 | 2 | 2 | 2 | 2 | 2 | 2 | 4 | 2   | 2 | 2 | 2 | 2 |
| ENAJ(OESE01C | 747601  | 753685  | 6085  | 1 | 1 | 2 | 2 | 2 | 2 | 2 | 2 | 2 | 2   | 2 | 2 | 2 | 2 |
| ENAJ(OESE01C | 417601  | 418500  | 900   | 0 | 2 | 2 | 2 | 2 | 2 | 2 | 2 | 2 | 2   | 2 | 2 | 2 | 2 |
| ENAJ(OESE01C | 453901  | 456600  | 2700  | 2 | 2 | 2 | 2 | 1 | 2 | 2 | 2 | 2 | 2   | 2 | 2 | 2 | 2 |
| ENAJ(OESE01C | 645301  | 649200  | 3900  | 2 | 2 | 2 | 2 | 2 | 2 | 2 | 2 | 2 | 2   | 2 | 3 | 2 | 2 |
| ENAJ(OESE01C | 1       | 3600    | 3600  | 2 | 1 | 2 | 2 | 2 | 2 | 2 | 2 | 2 | 2   | 2 | 4 | 2 | 2 |
| ENAJ(OESE01C | 45901   | 48900   | 3000  | 2 | 1 | 2 | 3 | 6 | 2 | 2 | 1 | 1 | 1   | 1 | 1 | 1 | 1 |
| ENAJ(OESE01C | 150901  | 162100  | 31200 | 1 | 1 | 1 | 1 | 2 | 1 | 2 | 2 | 4 | 1   | 2 | 2 | 1 | 1 |
| ENAJ(OESE01C | 200701  | 204300  | 3600  | 2 | 2 | 2 | 2 | 2 | 2 | 2 | 1 | 2 | 1   | 1 | 1 | 1 | 1 |
| ENAJ(OESE01C | 261901  | 267000  | 5100  | 2 | 2 | 2 | 2 | 2 | 2 | 2 | 3 | 3 | 2   | 3 | 2 | 5 | 1 |
| ENAJ(OESE01C | 383101  | 384900  | 1800  | 1 | 2 | 2 | 2 | 2 | 2 | 2 | 2 | 2 | 2   | 2 | 2 | 2 | 2 |
| ENAJ(OESE01C | 410401  | 413100  | 2700  | 2 | 2 | 3 | 2 | 2 | 2 | 2 | 2 | 2 | 2   | 2 | 2 | 2 | 2 |
| ENAJ(OESE01C | 454501  | 455700  | 1200  | 2 | 2 | 2 | 2 | 2 | 2 | 2 | 2 | 2 | 2   | 4 | 2 | 2 | 2 |
| ENAJ(OESE01C | 481201  | 482700  | 1500  | 2 | 2 | 2 | 6 | 2 | 2 | 6 | 2 | 2 | 2   | 6 | 2 | 2 | 2 |
| ENAJ(OESE01C | 490201  | 491400  | 1200  | 2 | 2 | 2 | 6 | 2 | 2 | 2 | 2 | 2 | 6   | 2 | 2 | 2 | 2 |
| ENAJ(OESE01C | 705601  | 707400  | 1800  | 2 | 2 | 2 | 2 | 2 | 2 | 2 | 1 | 2 | 2   | 2 | 1 | 2 | 2 |
| ENAJ(OESE01C | 721201  | 735300  | 14100 | 2 | 2 | 2 | 2 | 2 | 2 | 2 | 3 | 2 | 2   | 2 | 2 | 2 | 2 |
| ENAJ(OESE01C | 1       | 5400    | 5400  | 1 | 1 | 1 | 1 | 2 | 2 | 2 | 2 | 2 | 2   | 2 | 2 | 2 | 2 |
| ENAJ(OESE01C | 74701   | 75900   | 1200  | 3 | 2 | 2 | 2 | 2 | 2 | 2 | 2 | 2 | 2   | 2 | 2 | 2 | 2 |
| ENAJ(OESE01C | 364801  | 362200  | 17400 | 2 | 2 | 2 | 2 | 2 | 2 | 2 | 2 | 2 | 2   | 2 | 4 | 2 | 2 |
| ENAJ(OESE01C | 872401  | 875400  | 2     | 2 | 2 | 2 | 2 | 2 | 2 | 1 | 2 | 2 | 2   | 2 | 2 | 2 | 2 |
| ENAJ(OESE01C | 6301    | 6301    | 1800  | 1 | 1 | 1 | 0 | 2 | 2 | 2 | 2 | 2 | 2   | 2 | 2 | 2 | 2 |
| ENAJ(OESE01C | 27301   | 28200   | 900   | 2 | 2 | 2 | 2 | 2 | 2 | 1 | 2 | 2 | 2   | 2 | 2 | 2 | 2 |
| ENAJ(OESE01C | 102301  | 107400  | 5100  | 2 | 1 | 2 | 2 | 2 | 2 | 2 | 2 | 2 | 2   | 2 | 2 | 2 | 2 |
| ENAJ(OESE01C | 137101  | 138000  | 900   | 2 | 2 | 2 | 5 | 2 | 2 | 2 | 2 | 2 | 2   | 2 | 2 | 2 | 2 |
| ENAJ(OESE01C | 378301  | 380700  | 2400  | 2 | 2 | 2 | 3 | 2 | 2 | 2 | 2 | 2 | 2   | 2 | 2 | 2 | 2 |
| ENAJ(OESE01C | 422101  | 423300  | 1200  | 2 | 3 | 2 | 2 | 2 | 2 | 2 | 2 | 2 | 2   | 2 | 2 | 2 | 2 |
| ENAJ(OESE01C | 675001  | 678600  | 3600  | 2 | 2 | 2 | 2 | 2 | 2 | 2 | 2 | 1 | 2   | 2 | 2 | 1 | 1 |
| ENAJ(OESE01C | 684901  | 687300  | 2400  | 2 | 4 | 2 | 3 | 2 | 2 | 2 | 2 | 2 | 2   | 2 | 2 | 2 | 2 |
| ENAJ(OESE01C | 717301  | 721500  | 4200  | 2 | 4 | 2 | 2 | 2 | 2 | 2 | 2 | 2 | 2   | 2 | 2 | 2 | 2 |
| ENAJ(OESE01C | 873301  | 876900  | 3600  | 2 | 1 | 2 | 1 | 2 | 2 | 2 | 2 | 2 | 2   | 2 | 2 | 2 | 2 |
| ENAJ(OESE01C | 883501  | 886285  | 2785  | 2 | 4 | 2 | 2 | 2 | 2 | 2 | 2 | 2 | 2   | 2 | 2 | 2 | 2 |
| ENAJ(OESE01C | 1       | 900     | 900   | 2 | 2 | 8 | 2 | 2 | 2 | 2 | 2 | 2 | 2   | 2 | 2 | 2 | 2 |
| ENAJ(OESE01C | 9901    | 23700   | 13800 | 1 | 2 | 2 | 2 | 2 | 2 | 2 | 2 | 2 | 2   | 2 | 2 | 2 | 2 |
| ENAJ(OESE01C | 177001  | 177900  | 900   | 2 | 2 | 2 | 2 | 2 | 2 | 2 | 1 | 2 | 2   | 2 | 1 | 2 | 2 |
| ENAJ(OESE01C | 243601  | 244500  | 900   | 2 | 2 | 2 | 2 | 2 | 2 | 2 | 2 | 1 | 2   | 2 | 2 | 2 | 2 |
| ENAJ(OESE01C | 277201  | 278400  | 1200  | 1 | 2 | 1 | 2 | 2 | 2 | 2 | 2 | 2 | 2   | 2 | 2 | 2 | 2 |
| ENAJ(OESE01C | 278701  | 280200  | 1500  | 2 | 2 | 2 | 2 | 2 | 2 | 2 | 3 | 2 | 2   | 2 | 2 | 2 | 2 |
| ENAJ(OESE01C | 448801  | 453600  | 4800  | 2 | 2 | 2 | 2 | 2 | 2 | 2 | 1 | 2 | 2   | 2 | 2 | 1 | 1 |
| ENAJ(OESE01C | 493501  | 496800  | 3300  | 2 | 2 | 2 | 2 | 2 | 2 | 3 | 2 | 2 | 2   | 2 | 2 | 3 | 1 |
| ENAJ(OESE01C | 498301  | 499200  | 900   | 2 | 2 | 2 | 2 | 2 | 2 | 2 | 2 | 2 | 2   | 2 | 2 | 0 | 1 |
| ENAJ(OESE01C | 603601  | 605100  | 1500  | 2 | 2 | 2 | 2 | 2 | 2 | 3 | 2 | 2 | 2   | 2 | 2 | 2 | 2 |
| ENAJ(OESE01C | 612601  | 629700  | 17100 | 1 | 2 | 2 | 2 | 2 | 2 | 2 | 2 | 2 | 2   | 2 | 2 | 2 | 2 |
| ENAJ(OESE01C | 772201  | 773400  | 1200  | 2 | 2 | 2 | 2 | 2 | 3 | 2 | 2 | 2 | 2   | 2 | 2 | 2 | 2 |
| ENAJ(OESE01C | 831901  | 832800  | 900   | 2 | 2 | 2 | 2 | 2 | 2 | 2 | 2 | 2 | 2   | 2 | 2 | 1 | 1 |
| ENAJ(OESE01C | 873501  | 906417  | 32817 | 2 | 2 | 2 | 2 | 4 | 2 | 2 | 2 | 2 | 2   | 2 | 2 | 2 | 2 |
| ENAJ(OESE01C | 331501  | 333900  | 2400  | 2 | 2 | 2 | 2 | 2 | 2 | 1 | 2 | 2 | 2   | 2 | 2 | 2 | 2 |
| ENAJ(OESE01C | 356101  | 361500  | 5400  | 2 | 3 | 2 | 2 | 2 | 2 | 1 | 3 | 2 | 2   | 4 | 2 | 2 | 2 |
| ENAJ(OESE01C | 388201  | 398100  | 9900  | 2 | 2 | 2 | 2 | 2 | 2 | 2 | 4 | 2 | 2   | 2 | 2 | 2 | 2 |
| ENAJ(OESE01C | 513901  | 517500  | 3600  | 2 | 2 | 2 | 2 | 2 | 2 | 2 | 1 | 2 | 2   | 2 | 2 | 2 | 2 |
| ENAJ(OESE01C | 562801  | 581400  | 18600 | 1 | 1 | 1 | 1 | 2 | 2 | 2 | 2 | 2 | 2   | 2 | 2 | 2 | 2 |
| ENAJ(OESE01C | 752101  | 753000  | 900   | 2 | 2 | 2 | 2 | 2 | 2 | 2 | 1 | 2 | 2   | 2 | 2 | 2 | 2 |
| ENAJ(OESE01C | 878101  | 880800  | 2700  | 2 | 2 | 2 | 2 | 2 | 2 | 2 | 3 | 2 | 2   | 2 | 2 | 2 | 2 |
| ENAJ(OESE01C | 1031401 | 1032300 | 900   | 2 | 1 | 2 | 2 | 2 | 2 | 2 | 2 | 2 | 2   | 2 | 2 | 2 | 2 |
| ENAJ(OESE01C | 146101  | 151800  | 5700  | 2 | 2 | 2 | 2 | 2 | 2 | 2 | 2 | 2 | 2   | 2 | 2 | 2 | 2 |
| ENAJ(OESE01C | 224401  | 225300  | 900   | 2 | 2 | 2 | 2 | 2 | 2 | 2 | 1 | 2 | 2   | 2 | 2 | 2 | 2 |
| ENAJ(OESE01C | 309601  | 311100  | 1500  | 3 | 4 | 2 | 2 | 2 | 2 | 2 | 1 | 2 | 2   | 2 | 2 | 1 | 1 |
| ENAJ(OESE01C | 345001  | 348300  | 3300  | 2 | 2 | 2 | 2 | 2 | 2 | 2 | 2 | 2 | 2   | 2 | 2 | 2 | 2 |
| ENAJ(OESE01C | 666001  | 668400  | 2400  | 1 | 2 | 2 | 2 | 2 | 2 | 1 | 2 | 2 | 2   | 2 | 2 | 2 | 2 |
| ENAJ(OESE01C | 756001  | 757200  | 1200  | 2 | 2 | 2 | 2 | 2 | 3 | 2 | 2 | 2 | 2</ |   |   |   |   |
